# Supplementary material for: Boosting the oxygen reduction reaction activity of dual-atom catalysts on N-doped graphene by regulating the N coordination environment
Source: Royal Society of Chemistry journal article supplement (doi:10.1039/d3cp04831d), 2023-11-29
Supplement: d3cp04831d1.pdf [file d3cp04831d1.pdf]

# Boosting oxygen reduction reaction activity of dual-atom catalysts on N-doped graphene by regulating the N coordination environment

Lei Li,<sup>\*a,b</sup> Xiaoxia Wu,<sup>a,b</sup> Qiuying Du,<sup>a,b</sup> Narsu Bai<sup>a,b</sup>, and Yuhua Wen<sup>\*c</sup>

---

<sup>a</sup> Modern Physics research center, College of Physics and Electronic Information, Inner Mongolia Normal University, Hohhot 010022, China. E-mail: [lilei@imnu.edu.cn](mailto:lilei@imnu.edu.cn).

<sup>b</sup> Inner Mongolia Key Laboratory for Physics and Chemistry of Functional Materials, Hohhot 010022, China.

<sup>c</sup> Department of Physics, Xiamen University, Xiamen 361005, China. E-mail: [yhwen@xmu.edu.cn](mailto:yhwen@xmu.edu.cn).

† Electronic supplementary information (ESI) available. See DOI: <https://doi.org/10.1039/xxxx>.

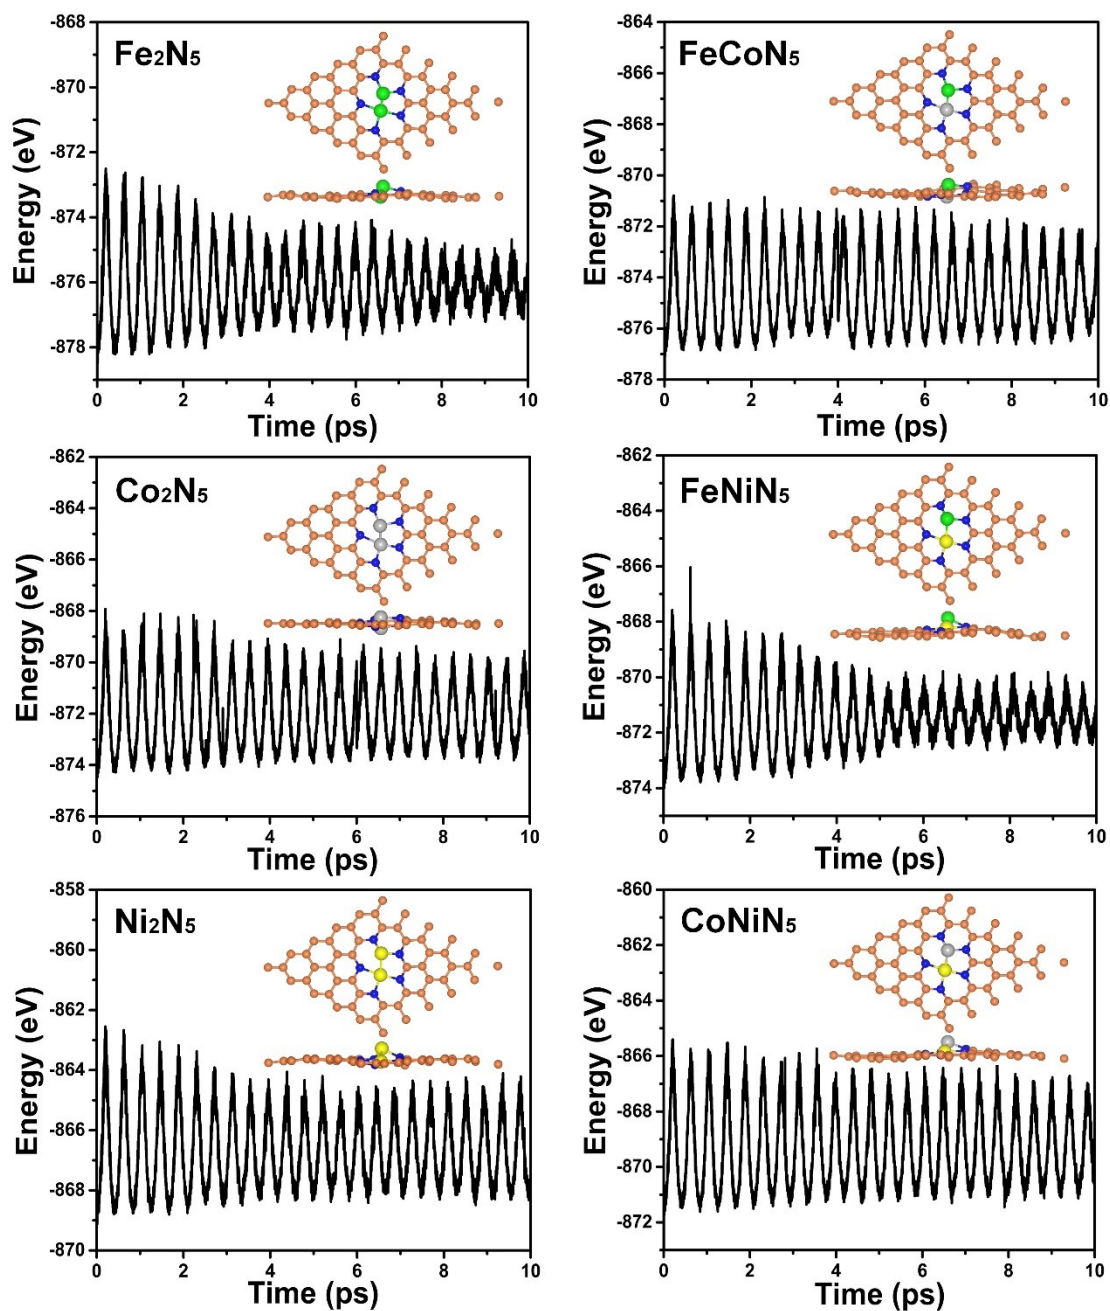

**Fig. S1** Evolution of energy with the elapsed time for AIMD simulations of  $M_1M_2N_5$  at 300 K. Inserts are top and side views of the snapshot of atomic configuration at 10 ps. The orange, blue, green, gray, and yellow balls denote C, N, Fe, Co, and Ni atoms, respectively.

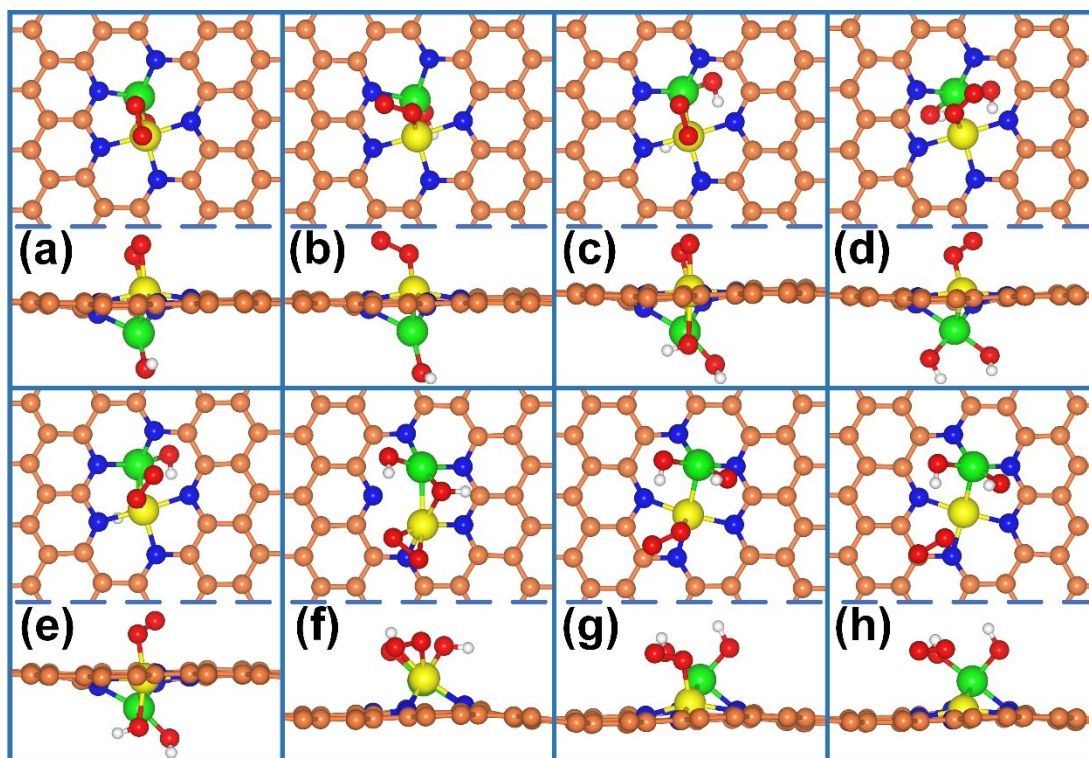

**Fig. S2** Schematic illustration of the adsorption structures of  $O_2$  molecular. (a)-(b) DS of  $Co_2N_5(OH)$  and other  $M_1M_2N_5(OH)$  structures. (c)-(e) DS of  $Fe_2N_5(OH_2)$ ,  $Co_2N_5(OH_2)$ , and other  $M_1M_2N_5(OH_2)$  structures. (f)-(h) RS of  $Fe_2N_5(OH_2)$ ,  $Co_2N_5(OH_2)/FeCoN_5(OH_2)$ , and other  $M_1M_2N_5(OH_2)$  structures. The orange, blue, green, yellow, red, and white balls denote C, N,  $M_1$ ,  $M_2$ , O, and H atoms, respectively.

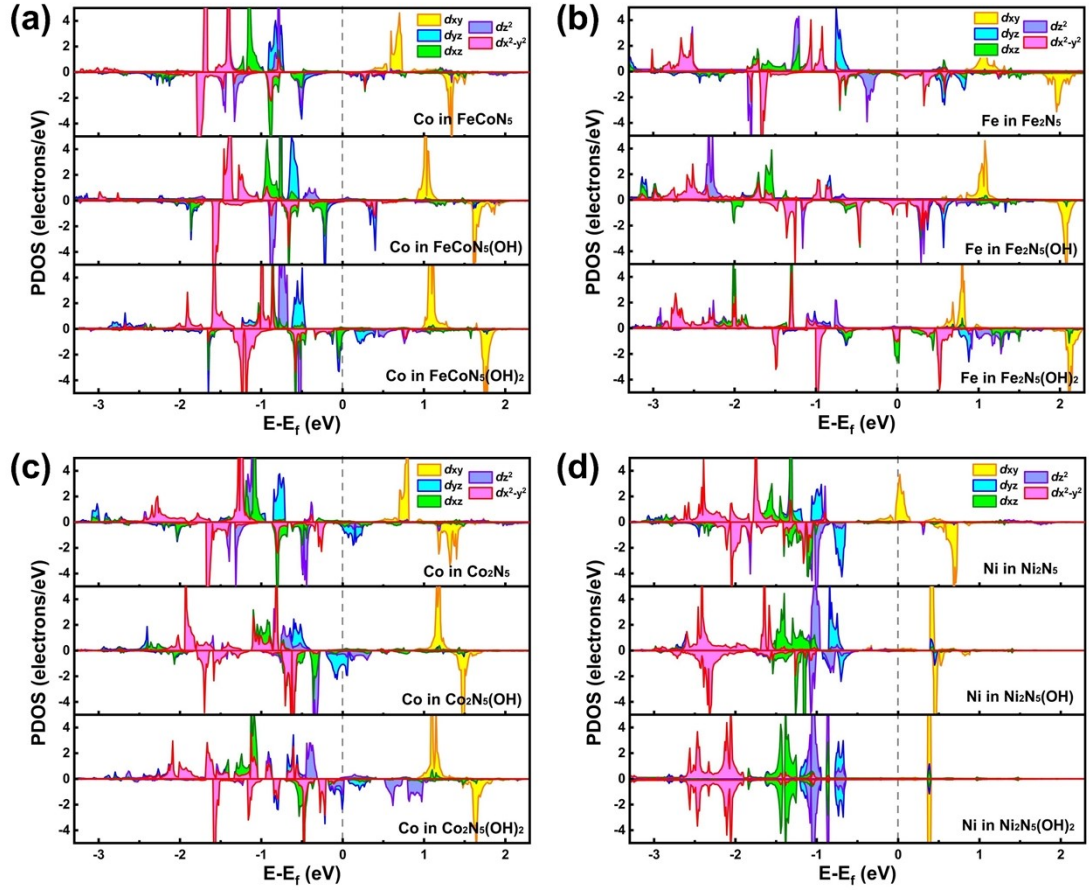

**Fig. S3** The PDOS of  $d$  orbitals of  $M_2$  atom in different structures. The dashed line indicates the Fermi level.

**Table S1.** Formation energy ( $E_f$ ) for  $M_1M_2N_5$ , binding energy ( $E_b$ ) between metal atoms and  $N_5$ -coordinated graphene, and cohesive energy ( $E_{coh}$ ) for the metal bulk.

| Model     | $E_f$ (eV) | $E_b$ (eV) | $E_{coh}$ (eV) | Model     | $E_f$ (eV) | $E_b$ (eV) | $E_{coh}$ (eV) |
|-----------|------------|------------|----------------|-----------|------------|------------|----------------|
| $Fe_2N_5$ | -5.46      | 5.11       | 4.14           | $FeCoN_5$ | -6.32      | 5.54       | 4.64           |
| $Co_2N_5$ | -6.78      | 5.77       | 5.13           | $FeNiN_5$ | -5.60      | 5.18       | 4.51           |
| $Ni_2N_5$ | -5.84      | 5.30       | 4.88           | $CoNiN_5$ | -6.30      | 5.53       | 5.01           |

**Table S2.** Adsorption energy ( $E_{\text{ads}}$ ) of the reaction intermediates (\*OOH, \*O, and \*OH)

| Model                                             | $E_{\text{ads}}(\text{eV})$ |       |       | Model                                 | $E_{\text{ads}}(\text{eV})$ |       |       |
|---------------------------------------------------|-----------------------------|-------|-------|---------------------------------------|-----------------------------|-------|-------|
|                                                   | *OOH                        | *O    | *OH   |                                       | *OOH                        | *O    | *OH   |
| Fe <sub>2</sub> N <sub>5</sub>                    | -3.25                       | -6.07 | -4.27 | FeCoN <sub>5</sub>                    | -3.07                       | -5.64 | -4.15 |
| Fe <sub>2</sub> N <sub>5</sub> (OH)               | -1.64                       | -5.38 | -3.49 | FeCoN <sub>5</sub> (OH)               | -2.06                       | -5.09 | -3.33 |
| Fe <sub>2</sub> N <sub>5</sub> (OH <sub>2</sub> ) | -2.04                       | -4.45 | -3.07 | FeCoN <sub>5</sub> (OH <sub>2</sub> ) | -1.71                       | -4.02 | -2.86 |
| Co <sub>2</sub> N <sub>5</sub>                    | -3.10                       | -5.70 | -3.99 | FeNiN <sub>5</sub>                    | -2.99                       | -6.15 | -4.39 |
| Co <sub>2</sub> N <sub>5</sub> (OH)               | -2.39                       | -5.33 | -3.72 | FeNiN <sub>5</sub> (OH)               | -2.04                       | -4.91 | -3.39 |
| Co <sub>2</sub> N <sub>5</sub> (OH <sub>2</sub> ) | -1.73                       | -3.72 | -2.85 | FeNiN <sub>5</sub> (OH <sub>2</sub> ) | -1.08                       | -3.01 | -2.22 |
| Ni <sub>2</sub> N <sub>5</sub>                    | -2.69                       | -4.92 | -3.94 | CoNiN <sub>5</sub>                    | -3.23                       | -5.73 | -4.17 |
| Ni <sub>2</sub> N <sub>5</sub> (OH)               | -1.92                       | -3.90 | -3.02 | CoNiN <sub>5</sub> (OH)               | -1.94                       | -4.32 | -3.11 |
| Ni <sub>2</sub> N <sub>5</sub> (OH <sub>2</sub> ) | -0.95                       | -2.80 | -2.05 | CoNiN <sub>5</sub> (OH <sub>2</sub> ) | -0.92                       | -2.82 | -2.04 |

on different catalysts.

**Table S3.** Distance of the M–O bond ( $d_{\text{M-O}}$ ) for the most stable adsorption structures of reaction intermediates (\*O<sub>2</sub>, \*OOH, \*O, and \*OH) on different catalysts.

| Model                                             | $d_{\text{M-O}}(\text{\AA})$ |       |       |       | Model                                 | $d_{\text{M-O}}(\text{\AA})$ |       |       |       |
|---------------------------------------------------|------------------------------|-------|-------|-------|---------------------------------------|------------------------------|-------|-------|-------|
|                                                   | *O <sub>2</sub>              | *OOH  | *O    | *OH   |                                       | *O <sub>2</sub>              | *OOH  | *O    | *OH   |
| Fe <sub>2</sub> N <sub>5</sub>                    | 1.824                        | 1.820 | 1.797 | 1.775 | FeCoN <sub>5</sub>                    | 1.821                        | 1.822 | 1.729 | 1.807 |
|                                                   | 1.817                        | 2.057 | 1.816 |       |                                       | 1.811                        | 2.049 | 1.843 |       |
| Fe <sub>2</sub> N <sub>5</sub> (OH)               | 1.849                        | 1.880 | 1.783 | 1.947 | FeCoN <sub>5</sub> (OH)               | 1.858                        | 1.814 | 1.731 | 1.819 |
|                                                   | 1.857                        |       | 1.793 | 2.056 |                                       | 1.864                        |       | 1.829 |       |
| Fe <sub>2</sub> N <sub>5</sub> (OH <sub>2</sub> ) | 1.816                        | 1.786 | 1.651 | 1.829 | FeCoN <sub>5</sub> (OH <sub>2</sub> ) | 1.828                        | 1.816 | 1.652 | 1.830 |
|                                                   | 1.982                        |       |       |       |                                       | 1.828                        |       | 1.652 |       |
| Co <sub>2</sub> N <sub>5</sub>                    | 1.817                        | 1.822 | 1.699 | 1.760 | FeNiN <sub>5</sub>                    | 1.810                        | 1.817 | 1.604 | 1.799 |
|                                                   | 1.810                        | 1.990 | 1.827 |       |                                       | 1.808                        |       | 1.604 |       |
| Co <sub>2</sub> N <sub>5</sub> (OH)               | 1.854                        | 1.800 | 1.747 | 1.907 | FeNiN <sub>5</sub> (OH)               | 1.840                        | 1.774 | 1.652 | 1.815 |
|                                                   | 1.830                        |       | 1.778 | 2.052 |                                       | 1.840                        |       | 1.652 |       |
| Co <sub>2</sub> N <sub>5</sub> (OH <sub>2</sub> ) | 1.855                        | 1.858 | 1.653 | 1.824 | FeNiN <sub>5</sub> (OH <sub>2</sub> ) | 1.895                        | 1.845 | 1.692 | 1.829 |
| Ni <sub>2</sub> N <sub>5</sub>                    | 1.794                        | 1.793 | 1.711 | 1.778 | CoNiN <sub>5</sub>                    | 1.829                        | 1.816 | 1.606 | 1.759 |
|                                                   | 1.849                        |       | 1.889 |       |                                       | 1.804                        |       | 2.009 |       |
| Ni <sub>2</sub> N <sub>5</sub> (OH)               | 1.875                        | 1.836 | 1.712 | 1.826 | CoNiN <sub>5</sub> (OH)               | 1.858                        | 1.791 | 1.701 | 1.806 |
|                                                   |                              |       |       |       |                                       |                              |       | 1.857 |       |
| Ni <sub>2</sub> N <sub>5</sub> (OH <sub>2</sub> ) | 1.959                        | 1.877 | 1.695 | 1.853 | CoNiN <sub>5</sub> (OH <sub>2</sub> ) | 1.933                        | 1.859 | 1.696 | 1.836 |

**Table S4.** Bader charge transfer ( $\Delta q$ ) for different structures. Note that the minus sign

| Model                                             | $\Delta q(\text{e})$ |                |      | Model                                 | $\Delta q(\text{e})$ |                |      |
|---------------------------------------------------|----------------------|----------------|------|---------------------------------------|----------------------|----------------|------|
|                                                   | M <sub>1</sub>       | M <sub>2</sub> | *OH  |                                       | M <sub>1</sub>       | M <sub>2</sub> | *OH  |
| Fe <sub>2</sub> N <sub>5</sub>                    | -0.69                | -0.73          |      | FeCoN <sub>5</sub>                    | -0.77                | -0.62          |      |
| Fe <sub>2</sub> N <sub>5</sub> (OH)               | -0.89                | -0.88          | 0.50 | FeCoN <sub>5</sub> (OH)               | -1.04                | -0.65          | 0.55 |
| Fe <sub>2</sub> N <sub>5</sub> (OH <sub>2</sub> ) | -1.06                | -1.07          | 1.02 | FeCoN <sub>5</sub> (OH <sub>2</sub> ) | -1.14                | -0.73          | 0.98 |
| Co <sub>2</sub> N <sub>5</sub>                    | -0.60                | -0.67          |      | FeNiN <sub>5</sub>                    | -0.66                | -0.60          |      |
| Co <sub>2</sub> N <sub>5</sub> (OH)               | -0.82                | -0.71          | 0.48 | FeNiN <sub>5</sub> (OH)               | -1.06                | -0.65          | 0.55 |
| Co <sub>2</sub> N <sub>5</sub> (OH <sub>2</sub> ) | -0.93                | -0.91          | 0.95 | FeNiN <sub>5</sub> (OH <sub>2</sub> ) | -1.16                | -0.68          | 0.98 |
| Ni <sub>2</sub> N <sub>5</sub>                    | -0.56                | -0.63          |      | CoNiN <sub>5</sub>                    | -0.61                | -0.63          |      |
| Ni <sub>2</sub> N <sub>5</sub> (OH)               | -0.78                | -0.70          | 0.51 | CoNiN <sub>5</sub> (OH)               | -0.84                | -0.67          | 0.49 |
| Ni <sub>2</sub> N <sub>5</sub> (OH <sub>2</sub> ) | -0.94                | -0.75          | 0.97 | CoNiN <sub>5</sub> (OH <sub>2</sub> ) | -1.00                | -0.71          | 0.96 |

denotes electron loss.
